# Supplementary material
Source: ML conference proceedings conference paper supplement (https://proceedings.neurips.cc/paper_files/paper/2019/hash/5352696a9ca3397beb79f116f3a33991-Abstract.html)
Supplement: Supplementary file [file 5352696a9ca3397beb79f116f3a33991-Supplemental.zip]

---

# Supplementary - Bat-G net: Bat-inspired High-Resolution 3D Image Reconstruction using Ultrasonic Echoes

---

Gunpil Hwang, Seohyeon Kim, and Hyeon-Min Bae  
School of Electrical Engineering  
Korea Advanced Institute of Science and Technology  
Daejeon, South Korea  
{gphwang, dddokman, hmbae}@kaist.ac.kr

## A. Additional Related Works

### A.1 Conventional Ultrasound Sensor

Ultrasonic sensors, called SONAR, have been used in the detection of submarines or shoals of fish, and used for the autonomous mobile robots to map and navigate in unknown and unstructured environments [1–5]. These ultrasonic sensors emit ultrasonic sounds with a single frequency and calculate the distance from the object by measuring the time-of-flight of echoes reflected from the object [6], and the accuracy of the measured distance can be enhanced by using frequency-modulated signals with a wideband frequency range [7–10]. It is possible to determine the position of an object in 3D space as well as distance by measuring the time difference between transmitter and receiver of several pairs, which is called 3D localization [11–15]. There are also sensors that apply beamforming to 3D localization by scanning the energy of reflected echoes in 3D space [16–20]. Efforts have been made to identify and classify the shape of the target object using ultrasound as well as the distance and position of the object. There have been approaches using the digitized envelope of amplitude of echoes [21], or High Range Resolution Profiles (HRRPs) [22], or the angle difference between the transducer and the object [12, 23], or the range-orientation and the amplitude-orientation relationships [24, 25] or ultrasound-tomography [26, 27]. However, the existing studies only classified the geometry elements such as planes, corners, and edges [12, 14, 23–25] and recognized the roughness of scattering surfaces such as flooring, carpets and asphalt [10, 24]. In contrast, our approach is able to locate the target and reconstruct the shape of geometric objects in 3D space beyond just recognizing and classifying the target object.

### A.2 Neural Network Approach

Various researches have been carried out using neural network to perform cross-domain conversion such as sensory-to-image conversion reconstruction. Such studies include the reconstruction of MRI image from the measurement of the sensor [28], the generation of an image of a player from the sound of a recorded instrument [29] and the tracking a person’s pose with sensory data obtained with an RF sensor [30]. In addition, there have been attempts to apply neural networks to the echolocation or sonar, which includes the recognition of the acoustic image of 3D objects from the receiver arrays [31], the perception of a cube and a tetrahedron from the features of the spectrogram of the echoes [32], and the classification of the faces of the humans [33]. In this paper, We tried to convert the sensory data obtained from the ultrasonic sensor to the visual domain employing the neural network (referred to as Bat-G net) for the first time. The Bat-G network accomplished the 3D localization and the reconstruction of the shape of the target object.

## B. Network Structures for Comparison and Ablation Studies

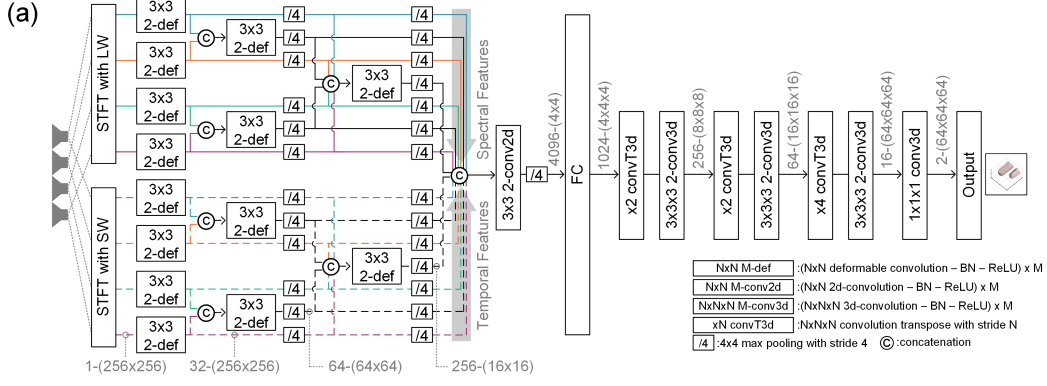

Bat-G net (UCM 4-ch)

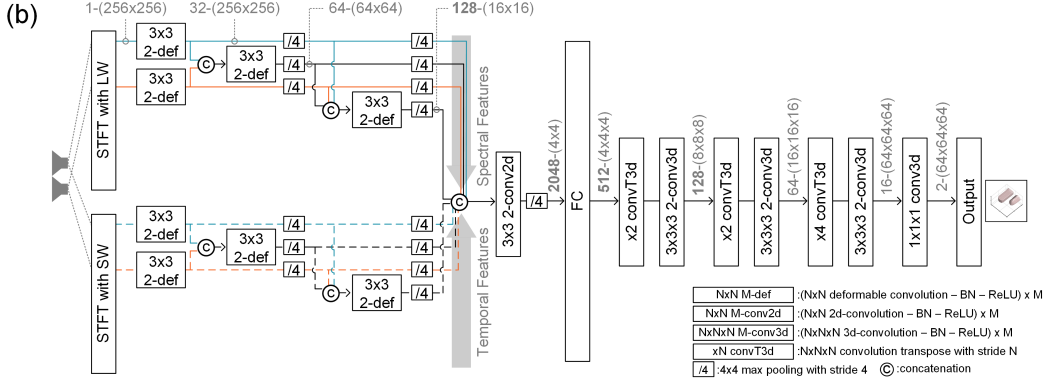

Bat-G net (UCM 2-ch)

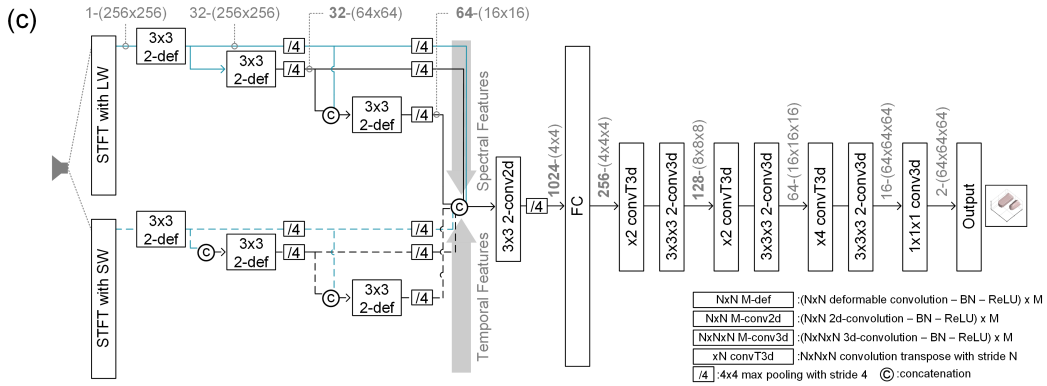

Bat-G net (UCM 1-ch)

Figure S1: Architectures of the Bat-G network employing (a) 4-channel UCM input data, (b) 2-channel UCM input data, and (c) 1-channel UCM input data

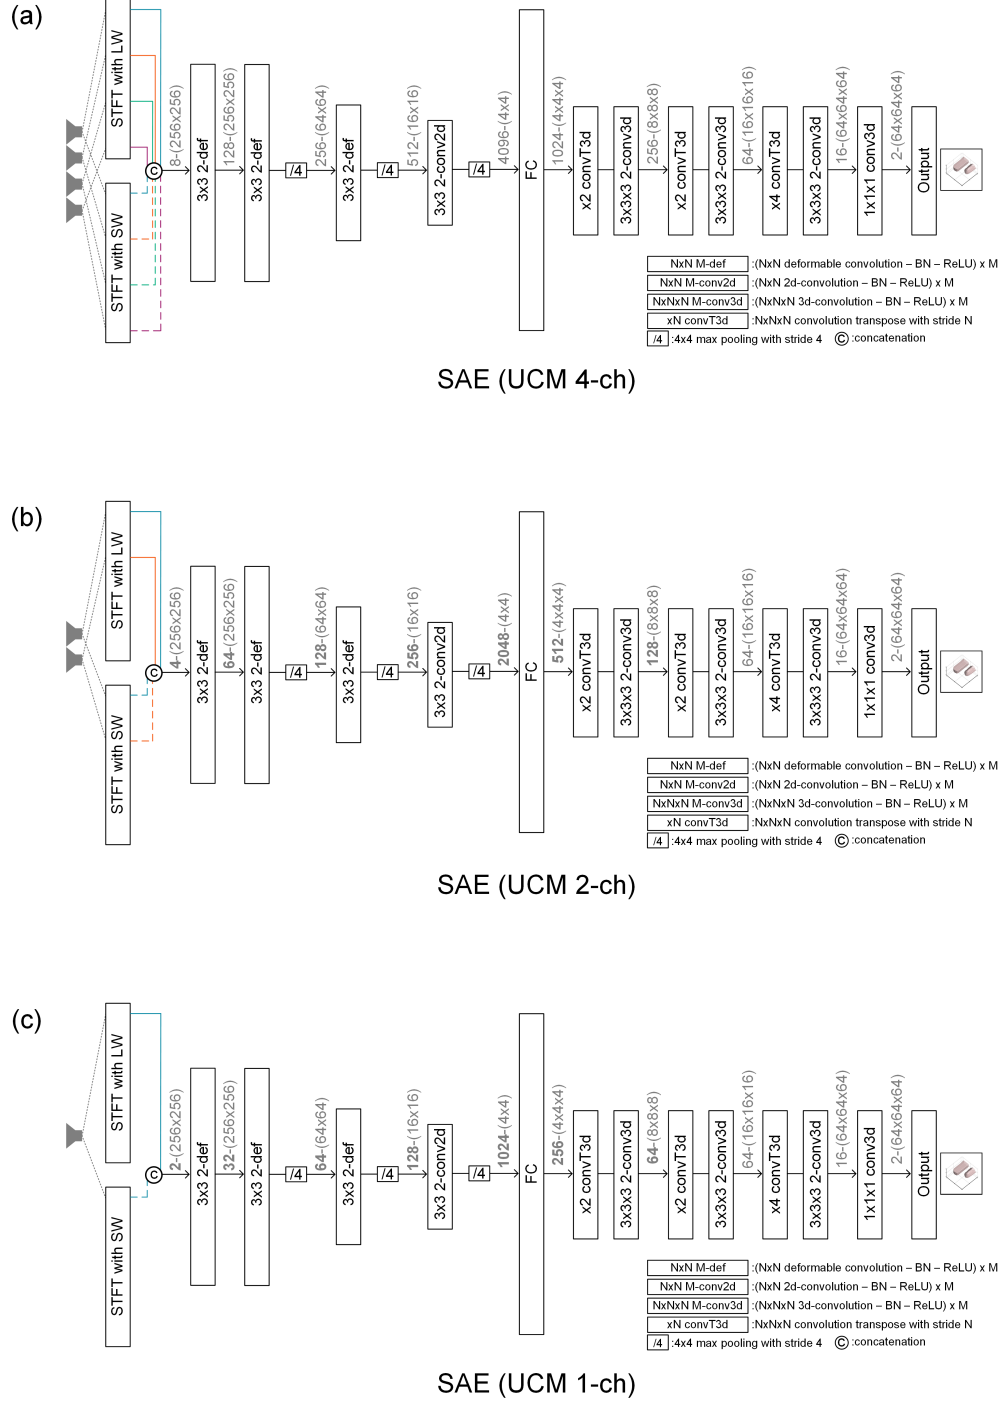

Figure S2: Architectures of the stacked auto-encoder (SAE) employing (a) 4-channel UCM input data, (b) 2-channel UCM input data, and (c) 1-channel UCM input data

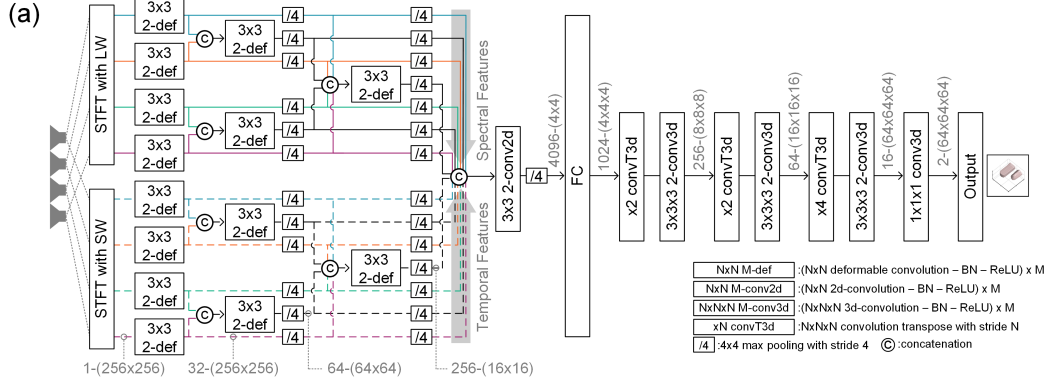

Spectral + Temporal / Biomimetic

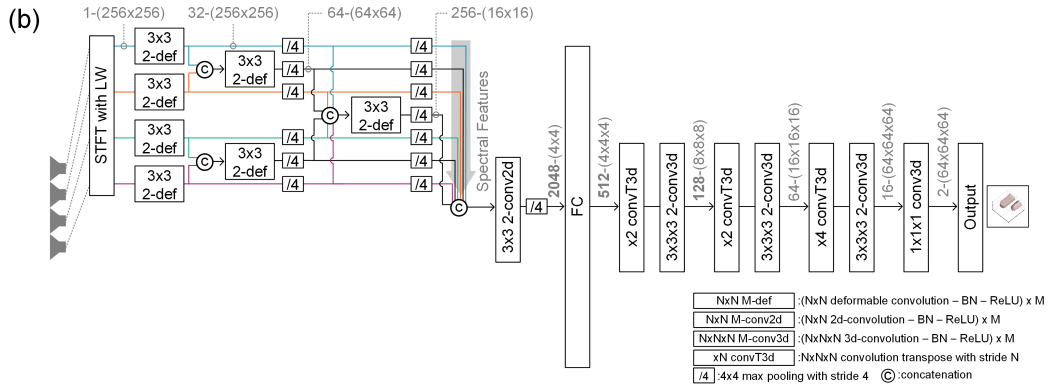

Spectral / Biomimetic

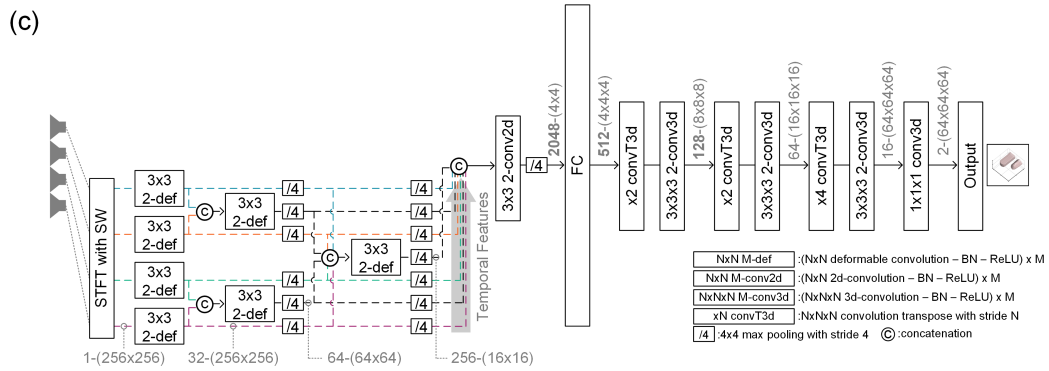

Temporal / Biomimetic

Figure S3: Architectures of the Bat-G network with (a) the spectral/temporal-cue dominant pathways, (b) the spectral-cue dominant pathway, and (c) the temporal-cue dominant pathway

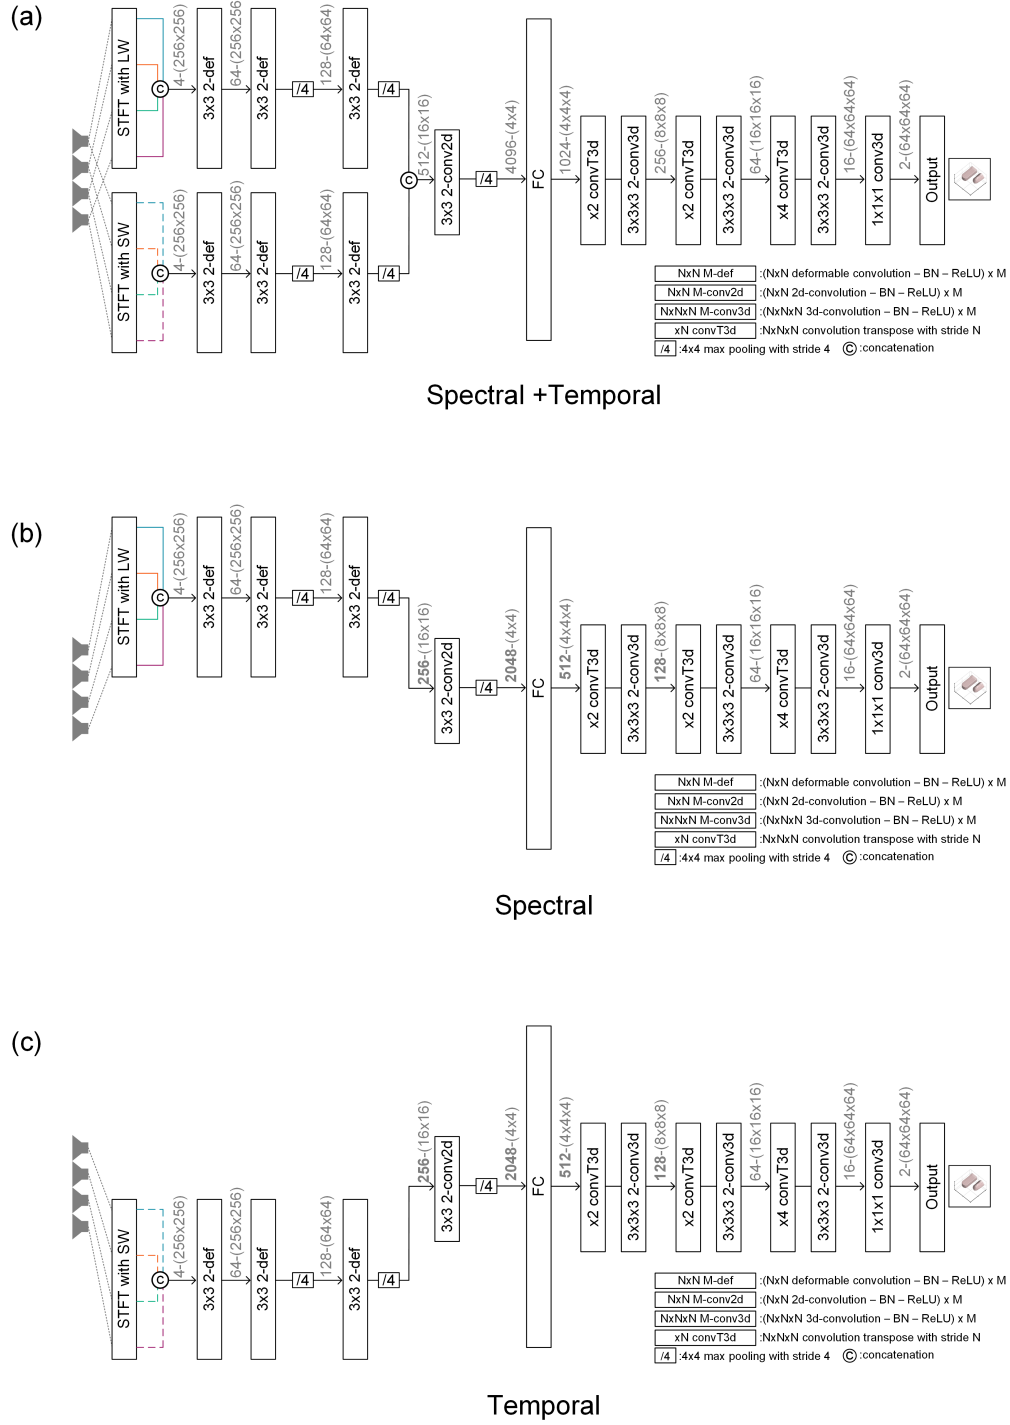

Figure S4: Architectures of biomimetic-connection-ablated Bat-G network with (a) the spectral/temporal-cue dominant pathways, (b) the spectral-cue dominant pathway, and (c) the temporal-cue dominant pathway

## References

- [1] Alberto Elfes. Sonar-based real-world mapping and navigation. *IEEE Journal on Robotics and Automation*, 3(3):249–265, 1987.
- [2] Jun’ichi Iijima et al. Searching unknown 2-d environment by a mobile robot with a range sensor. *Computers & electrical engineering*, 18(1):83–98, 1992.
- [3] Johann Borenstein and Yoram Koren. Obstacle avoidance with ultrasonic sensors. *IEEE Journal on Robotics and Automation*, 4(2):213–218, 1988.
- [4] A Curran and Kostas J Kyriakopoulos. Sensor-based self-localization for wheeled mobile robots. *Journal of Robotic Systems*, 12(3):163–176, 1995.
- [5] Ömür Bozma and Roman Kuc. Building a sonar map in a specular environment using a single mobile sensor. *IEEE Transactions on Pattern Analysis & Machine Intelligence*, (12):1260–1269, 1991.
- [6] Joseph C Jackson, Rahul Summan, Gordon I Dobie, Simon M Whiteley, S Gareth Pierce, and Gordon Hayward. Time-of-flight measurement techniques for airborne ultrasonic ranging. *IEEE transactions on ultrasonics, ferroelectrics, and frequency control*, 60(2):343–355, 2013.
- [7] Ömür Bozma and Roman Kuc. Characterizing pulses reflected from rough surfaces using ultrasound. *The Journal of the Acoustical Society of America*, 89(6):2519–2531, 1991.
- [8] G Kaniak and H Schweinzer. A 3d airborne ultrasound sensor for high-precision location data estimation and conjunction. In *Instrumentation and Measurement Technology Conference Proceedings, 2008. IMTC 2008. IEEE*, pages 842–847. IEEE, 2008.
- [9] K Herman and L Stach. Analysis and elaboration of an air-coupled ultrasound wideband sensor array. *Acta Physica Polonica A*, 123(1):31–33, 2013.
- [10] Zafiris Politis and Penny J Probert. Modeling and classification of rough surfaces using ctfm sonar imaging. In *Robotics and Automation, 1999. Proceedings. 1999 IEEE International Conference on*, volume 4, pages 2988–2993. IEEE, 1999.
- [11] Herbert Peremans, Koenraad Audenaert, and Jan M Van Campenhout. A high-resolution sensor based on tri-aural perception. *IEEE Transactions on Robotics and Automation*, 9(1):36–48, 1993.
- [12] Huzeifa Akbarally and Lindsay Kleeman. A sonar sensor for accurate 3d target localisation and classification. In *Robotics and Automation, 1995. Proceedings., 1995 IEEE International Conference on*, volume 3, pages 3003–3008. IEEE, 1995.
- [13] Billur Barshan and Roman Kuc. A bat-like sonar system for obstacle localization. *IEEE Transactions on systems, man, and cybernetics*, 22(4):636–646, 1992.
- [14] Lindsay Kleeman. On-the-fly classifying sonar with accurate range and bearing estimation. In *Intelligent Robots and Systems, 2002. IEEE/RSJ International Conference on*, volume 1, pages 178–183. IEEE, 2002.
- [15] Youngjoon Han and Hernsoo Hahn. Localization and classification of target surfaces using two pairs of ultrasonic sensors. *Robotics and autonomous systems*, 33(1):31–41, 2000.
- [16] Ming Yang, SL Hill, and John O Gray. Design of ultrasonic linear array system for multi-object identification. In *Intelligent Robots and Systems, 1992., Proceedings of the 1992 IEEE/RSJ International Conference on*, volume 3, pages 1625–1632. IEEE, 1992.
- [17] Marco Moebus and Abdelhak M Zoubir. Three-dimensional ultrasound imaging in air using a 2d array on a fixed platform. In *Acoustics, Speech and Signal Processing, 2007. ICASSP 2007. IEEE International Conference on*, volume 2, pages II–961. IEEE, 2007.
- [18] Jan Steckel. Sonar system combining an emitter array with a sparse receiver array for air-coupled applications. *IEEE Sensors Journal*, 15(6):3446–3452, 2015.
- [19] Jan Steckel, Andre Boen, and Herbert Peremans. Broadband 3-d sonar system using a sparse array for indoor navigation. *IEEE Transactions on Robotics*, 29(1):161–171, 2013.
- [20] Marcos Turqueti, Vitaliy Kunin, Bill Cardoso, Jafar Saniie, and Erdal Oruklu. Acoustic sensor array for sonic imaging in air. In *Ultrasonics Symposium (IUS), 2010 IEEE*, pages 1833–1836. IEEE, 2010.
- [21] Roman Kuc. Biomimetic sonar recognizes objects using binaural information. *The Journal of the Acoustical Society of America*, 102(2):689–696, 1997.

- [22] A Balleri, HD Griffiths, CJ Baker, K Woodbridge, and MW Holderied. Analysis of acoustic echoes from a bat-pollinated plant species: insight into strategies for radar and sonar target classification. *IET Radar, Sonar & Navigation*, 6(6):536, 2012.
- [23] Lindsay Kleeman and Roman Kuc. Mobile robot sonar for target localization and classification. *The International Journal of Robotics Research*, 14(4):295–318, 1995.
- [24] Gordon Kao and Penny Probert. Feature extraction from a broadband sonar sensor for mapping structured environments efficiently. *The International Journal of Robotics Research*, 19(10):895–913, 2000.
- [25] Angelo M Sabatini. Ultrasound-based active hearing techniques for tracking and identification of objects. In *Intelligent Control, 1992., Proceedings of the 1992 IEEE International Symposium on*, pages 48–53. IEEE, 1992.
- [26] Alessio Balleri, Hugh D Griffiths, Karl Woodbridge, Chris J Baker, and Marc W Holderied. Bat-inspired ultrasound tomography in air. In *Radar Conference, 2010 IEEE*, pages 44–47. IEEE, 2010.
- [27] Dmitry Y Sukhanov, Nadezhda N Erzakova, et al. Three-deminshional ultrasound tomography using multi-angle bistatic sounding. 2015.
- [28] Bo Zhu, Jeremiah Z Liu, Stephen F Cauley, Bruce R Rosen, and Matthew S Rosen. Image reconstruction by domain-transform manifold learning. *Nature*, 555(7697):487, 2018.
- [29] Lele Chen, Sudhanshu Srivastava, Zhiyao Duan, and Chenliang Xu. Deep cross-modal audio-visual generation. In *Proceedings of the on Thematic Workshops of ACM Multimedia 2017*, pages 349–357. ACM, 2017.
- [30] Mingmin Zhao, Tianhong Li, Mohammad Abu Alsheikh, Yonglong Tian, Hang Zhao, Antonio Torralba, and Dina Katabi. Through-wall human pose estimation using radio signals. In *2018 IEEE/CVF Conference on Computer Vision and Pattern Recognition*, pages 7356–7365. IEEE, 2018.
- [31] Sumio Watanabe and Masahide Yoneyama. An ultrasonic visual sensor for three-dimensional object recognition using neural networks. *IEEE transactions on Robotics and Automation*, 8(2):240–249, 1992.
- [32] Itiel E Dror, Mark Zagaeski, and Cynthia F Moss. Three-dimensional target recognition via sonar: a neural network model. *Neural Networks*, 8(1):149–160, 1995.
- [33] Itiel E Dror, Faith L Florer, Damien Rios, and Mark Zagaeski. Using artificial bat sonar neural networks for complex pattern recognition: Recognizing faces and the speed of a moving target. *Biological Cybernetics*, 74(4):331–338, 1996.
